# Supplementary material
Source: PubMed Central journal article supplement (PMC4943925)
Supplement: NIHMS797177-supplement-1.pdf [file NIHMS797177-supplement-1.pdf]

Supplemental fig. 1

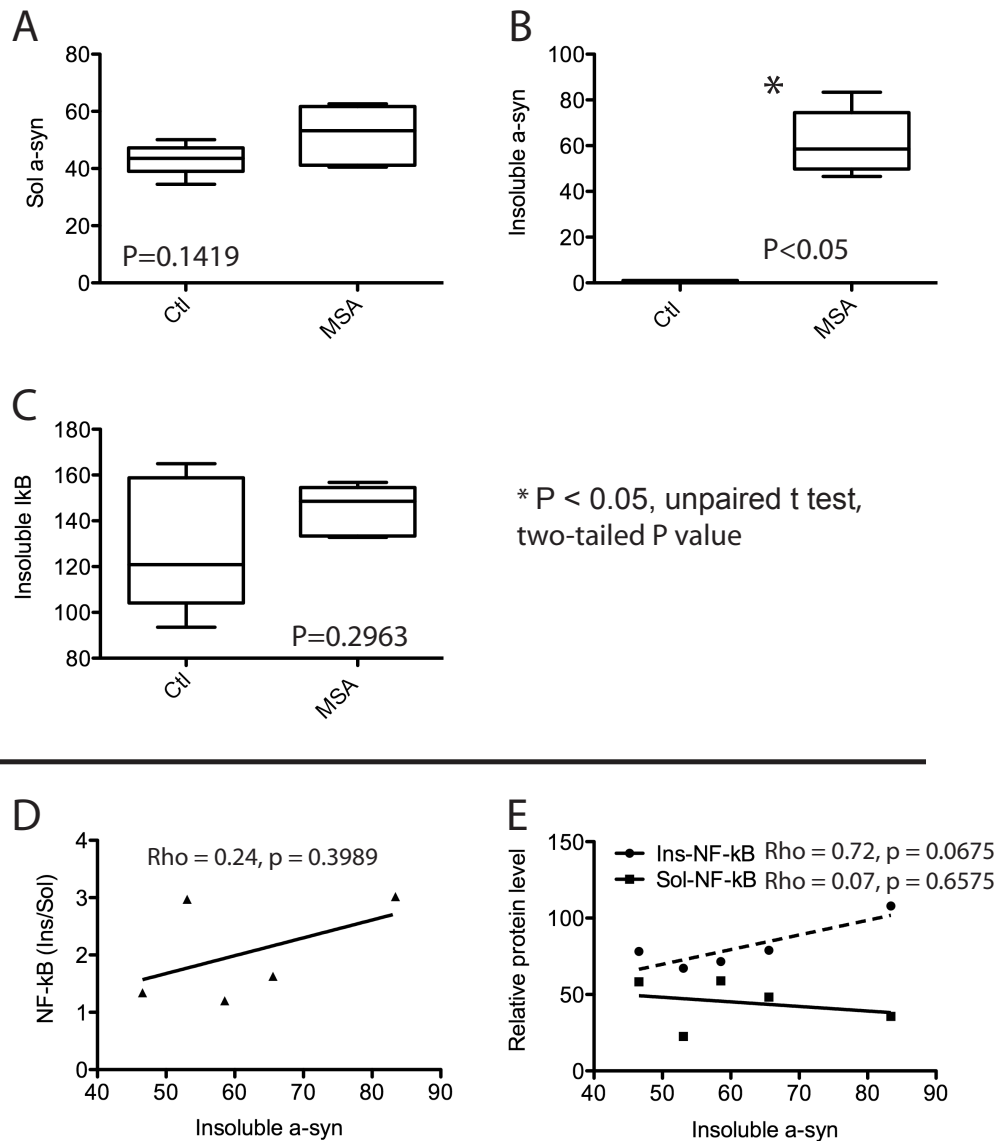

Correlation analyses of  $\alpha$ -syn, I $\kappa$ B $\alpha$  and NF- $\kappa$ B levels based on Fig. 5A.

Brain tissue (precentral gyrus white matter) from 5 control and 5 MSA patients was separated in soluble and insoluble proteins and analyzed by SDS-PAGE and immunoblotting as depicted in Fig. 5. The intensities of the individual bands in soluble and insoluble fractions were quantified and band intensities were normalized to  $\beta$ -actin. A, Relative amounts of soluble  $\alpha$ -syn in control and MSA cases. There is no significant difference between the samples ( $p > 0.05$ ). B, Relative amounts of insoluble  $\alpha$ -syn in control and MSA cases. The increase is significant ( $p < 0.05$ ). C, Relative amounts of insoluble I $\kappa$ B $\alpha$  in control and MSA cases. There is no significant difference between the samples ( $p > 0.05$ ). Box plots indicate mean, min, max and S.D. values of the five cases and asterisk indicates significant difference between boxes when analyzed by unpaired t test (two tailed  $p < 0.05$ ). D, Ratio of insoluble and soluble NF- $\kappa$ B in MSA cases correlated to levels of insoluble  $\alpha$ -syn. There was no correlation between the insol./sol NF- $\kappa$ B and the level of insoluble  $\alpha$ -syn (Rho=0.24,  $p = 0.40$ ). E, Relative levels of insoluble and soluble NF- $\kappa$ B in MSA cases correlated to levels of insoluble  $\alpha$ -syn. There was no correlation between the insoluble (Rho=0.72,  $p > 0.05$ ) and soluble NF- $\kappa$ B (Rho=0.07,  $p > 0.05$ ) and the level of insoluble  $\alpha$ -syn. The least squares lines are presented.
